# Supplementary material
Source: Springer Nature journal article supplement (https://www.springermedizin.de/resource/supplementary/12936_2012_2507_MOESM2_ESM.pdf/9543118)
Supplement: MOESM2 [file 9543118]

Febrile patients screened at Phuoc Long district health stations  
**6903 patients**

Smears (-) = 6389

*P. falciparum* = 323  
*P. vivax* = 159  
Mixed infection = 32

Excluded 157 cases with  
Pf < 10,000 / $\mu$ L or  
> 100,000 / $\mu$ L, severe malaria or  
no consent form

**166 *P. falciparum***

Randomization

ARTESUNATE  
2 mg/kg/day  
**55**

ARTESUNATE  
4 mg/kg/day  
**56**

DHA-PQP  
**55**

4 withdrawals (1 vivax,  
1 SAE)  
2 lost on FU

6 withdrawals  
(1 vivax,  
1 splenectomized)  
4 lost to FU

1 withdrawal  
2 lost to FU

Complete 42 days FU  
**49(89%)**

Complete 42 day FU  
**46(82%)**

Completed 42 day FU  
**52(94%)**
